# Supplementary material for: Quantification of 363 Pesticides in Leafy Vegetables (Dill, Rocket and Parsley) in the Turkey Market by Using QuEChERS with LC-MS/MS and GC-MS/MS
Source: MDPI journal article supplement (doi:10.3390/foods12051034), 2023-02-28
Supplement: s1 [file s1]

## Supplementary materials

**Table S1.** MRM parameters for 311 pesticide residues by LC-MS/MS.

| Pesticide             | MRM transitions                                   |                                                  |
|-----------------------|---------------------------------------------------|--------------------------------------------------|
|                       | quantifier ion, <i>m/z</i> (collision energy, eV) | qualifier ion, <i>m/z</i> (collision energy, eV) |
| 2,4-D                 | 219.0/160.8 (20)                                  | 219.0/124.9 (38)                                 |
| Acephate              | 184.0/142.9 (13)                                  | 184.0/124.9 (25)                                 |
| Acetamiprid           | 223.1/126 (31)                                    | 223.1/99.0 (55)                                  |
| Acibenzolar-s-methyl  | 211.0/136.1 (41)                                  | 211.0/91.1 (29)                                  |
| Aldicarb              | 208.1/116.0 (11)                                  | 208.1/88.9 (20)                                  |
| Aldicarb sulfone      | 223.2/86.1 (21)                                   | 223.2/147.9 (13)                                 |
| Aldicarb sulfoxide    | 207.2/132.0 (11)                                  | 207.2/88.9 (19)                                  |
| Aminocarb             | 209.1/152.1 (19)                                  | 209.1/137.2 (31)                                 |
| Amitraz               | 294.0/163.0 (17)                                  | 294.0/122.0 (41)                                 |
| Anilofos              | 368.0/199.0 (21)                                  | 368.0/125.0 (45)                                 |
| Atrazine-desethyl     | 188.1/146.1 (23)                                  | 188.1/110.1 (31)                                 |
| Atrazine-desisopropyl | 174.1/104.1 (33)                                  | 174.1/132.1 (25)                                 |
| Azaconazole           | 300.0/159.0 (37)                                  | 300.0/231.0 (23)                                 |
| Azamethiphos          | 325.0/183.0 (23)                                  | 325.0/138.9 (37)                                 |
| Azinphos ethyl        | 346.0/132.1 (23)                                  | 346.0/160.1 (15)                                 |
| Azinphos methyl       | 318.0/132.0 (21)                                  | 318.0/160.0 (13)                                 |
| Azoxystrobin          | 404.1/372.0 (21)                                  | 404.1/344.1 (35)                                 |
| Benalaxyl             | 326.0/148.0 (27)                                  | 326.0/208.0 (21)                                 |
| Benazolin             | 243.9/220.9 (32)                                  | 243.9/170.0 (23)                                 |
| Bendiocarb            | 224.1/167.2 (13)                                  | 224.1/108.9 (21)                                 |
| Benodanil             | 324.0/231.0 (13)                                  | 324.0/120.0 (25)                                 |
| Benoxacor             | 260.1/149.1 (25)                                  | 260.1/134.1 (41)                                 |
| Bensulfuron-methyl    | 411.1/148.9 (27)                                  | 411.1/119.0 (51)                                 |
| Bentazone             | 239.0/131.9 (38)                                  | 239.0/196.9 (28)                                 |
| Bitertanol            | 338.0/269.0 (15)                                  | 338.0/70.0 (25)                                  |
| Bixafen               | 411.9/90.9 (58)                                   | 411.9/279.8 (34)                                 |
| Boscalid              | 343.0/307.0 (27)                                  | 343.0/140.0 (27)                                 |
| Bromacil              | 261.0/205.0 (33)                                  | 261.0/188.0 (36)                                 |
| Bromoxynil            | 275.7/78.6 (40)                                   | 275.7/80.6 (42)                                  |
| Bromuconazole         | 378.0/159.0 (37)                                  | 378.0/70.0 (35)                                  |
| Bupirimate            | 317.2/166.0 (35)                                  | 317.2/108.0 (37)                                 |
| Buprofezin            | 306.2/201.0 (19)                                  | 306.2/115.9 (23)                                 |
| Butachlor             | 312.2/238.1 (31)                                  | 312.2/162.1 (35)                                 |
| Butafenacil           | 492.2/331.0 (31)                                  | 492.2/180.2 (63)                                 |
| Butamifos             | 350.0/333.1 (15)                                  | 350.0/152.0 (31)                                 |
| Buturon               | 237.2/84.2 (23)                                   | 237.2/126.1 (41)                                 |
| Butylate              | 218.1/57.1 (29)                                   | 218.1/156.2 (15)                                 |
| Cadusafos             | 271.1/158.9 (21)                                  | 271.1/214.9 (13)                                 |
| Carbaryl              | 202.1/145.0 (15)                                  | 202.1/127.0 (41)                                 |
| Carbendazim           | 192.1/160.0 (29)                                  | 192.1/132.0 (45)                                 |
| Carbofuran            | 222.1/165.0 (17)                                  | 222.1/123.1 (31)                                 |
| Carboxin              | 236.0/143.0 (21)                                  | 236.0/87.0 (33)                                  |
| Chlorbromuron         | 295.1/225.9 (27)                                  | 295.1/182.0 (23)                                 |

|                             |                  |                  |
|-----------------------------|------------------|------------------|
| Chlorfluazuron              | 539.9/383.0 (47) | 539.9/158.0 (47) |
| Chloridazon                 | 222.0/92.0 (35)  | 222.0/104.0 (31) |
| Chloroxuron                 | 291.0/72.0 (41)  | 291.0/218.1 (35) |
| Chlorpyrifos                | 350.0/96.9 (49)  | 350.0/197.9 (27) |
| Chlorsulfuron               | 358.0/141.0 (23) | 358.0/167.0 (25) |
| Cinosulfuron                | 414.1/183.1 (21) | 414.1/157.0 (33) |
| Clethodim                   | 360.0/164.0 (25) | 360.0/268.0 (17) |
| Clodinafop propargyl        | 350.1/266.0 (23) | 350.1/91.2 (43)  |
| Clofentezine                | 303.1/138.1 (21) | 303.1/102.2 (61) |
| Clomazone                   | 240.0/125.0 (27) | 240.0/89.0 (65)  |
| Clopyralid                  | 191.9/146.0 (29) | 191.9/110.1 (47) |
| Clothianidin                | 250.0/169.1 (17) | 250.0/132.0 (19) |
| Crimidine                   | 172.2/136.1 (29) | 172.2/107.1 (37) |
| Crotoxyphos                 | 315.1/211.0 (24) | 315.1/193.0 (27) |
| Cyanazine                   | 241.1/214.1 (25) | 241.1/216.1 (25) |
| Cyazofamid                  | 325.0/108.0 (19) | 325.0/261.0 (15) |
| Cycloate                    | 216.2/154.2 (17) | 216.2/134.2 (19) |
| Cyclohexamide               | 282.2/264.0 (15) | 282.2/246.1 (21) |
| Cycloxydim                  | 326.2/280.1 (21) | 326.2/252.1 (33) |
| Cycluron                    | 199.2/111.1 (35) | 199.2/89.1 (21)  |
| Cyflufenamid                | 413.2/295.0 (23) | 413.2/141.0 (33) |
| Cyhalofop-butyl             | 375.1/256.1 (21) | 375.1/358.1 (11) |
| Cymoxanil                   | 199.0/127.9 (13) | 199.0/111.0 (18) |
| Cyproconazole               | 292.0/70.0 (49)  | 292.0/125.1 (37) |
| Cyprodinil                  | 226.1/93.1 (49)  | 226.1/77.0 (65)  |
| Daimuron                    | 269.2/151.1 (15) | 269.2/134.1 (19) |
| Demeton-s-(disulfoton oxon) | 259.1/89.1 (6)   | 259.1/61.0 (16)  |
| Demeton-s-methyl sulfone    | 263.0/168.9 (23) | 263.0/120.8 (23) |
| Demeton-s-methyl sulfoxide  | 247.1/169.0 (17) | 247.1/125.0 (19) |
| Desmedipham                 | 318.0/136.0 (33) | 318.0/182.0 (19) |
| Desmetryn                   | 214.1/172.1 (5)  | 214.1/82.0 (7)   |
| Diafenthiuron               | 385.2/329.2 (27) | 385.2/278.1 (43) |
| Diazinon                    | 305.1/169.0 (31) | 305.1/97.0 (47)  |
| Diazinon-oxon               | 289.1/261.1 (2)  | 289.1/233.1 (4)  |
| Dichlormid                  | 208.0/140.0 (27) | 208.0/98.1 (31)  |
| Dichlorprop                 | 233.0/161.0 (5)  | 233.0/125.0 (5)  |
| Dichlorvos                  | 221.0/108.9 (25) | 221.0/127.0 (25) |
| Diclobutrazol               | 328.1/199.0 (21) | 328.1/159.0 (26) |
| Dicrotophos                 | 238.0/112.0 (10) | 238.0/193.0 (10) |
| Diethofencarb               | 268.1/226.1 (13) | 268.1/124.1 (41) |
| Difenoconazole              | 406.0/251.0 (37) | 406.0/188.0 (37) |
| Difenoxuron                 | 287.1/214.1 (5)  | 287.1/214.1 (5)  |
| Diqlubenzuron               | 310.9/158.0 (6)  | 310.9/141.0 (15) |
| Dimefuron                   | 339.1/295.1 (7)  | 339.1/256.0 (18) |
| Dimethachlor                | 256.4/224.3 (8)  | 256.4/148.3 (24) |
| Dimethenamid                | 276.1/244.1 (7)  | 276.1/168.2 (21) |
| Dimethoate                  | 230.0/198.9 (3)  | 230.0/125 (17)   |
| Dimethomorph                | 388.2/301 (17)   | 388.2/165 (31)   |
| Dimetilan                   | 241.0/196.1 (4)  | 241.0/72 (14)    |

|                        |                  |                  |
|------------------------|------------------|------------------|
| Dimoxystrobin          | 327.1/205.1 (12) | 327.1/116.1 (23) |
| Diniconazole           | 326.2/70.2 (25)  | 326.2/43.2 (47)  |
| Dinitramine            | 323.0/289.0 (14) | 323.0/261.0 (12) |
| Dinocap                | 382.1/86.0 (2)   | 382.1/69 (4)     |
| Dinotefuran            | 203.1/157.1 (21) | 203.1/129.1 (21) |
| Dioxacarb              | 224.0/167.1 (2)  | 224.0/123.0 (12) |
| Diphenamid             | 240.3/167.1 (19) | 240.3/134.2 (17) |
| Disulfoton sulfone     | 306.9/171.0 (8)  | 206.9/153.1 (8)  |
| Disulfoton sulfoxide   | 290.9/184.9 (8)  | 290.9/157 (20)   |
| Dithianon              | 295.9/263.8 (12) | 295.9/237.9 (12) |
| Dithiopyr              | 402.1/382.1 (3)  | 402.1/360.0 (3)  |
| Diuron                 | 233.1/72.2 (17)  | 233.1/46.3 (13)  |
| Dodine                 | 228.2/71.1 (20)  | 228.2/57.1 (22)  |
| Edifenphos             | 311.0/283.0 (12) | 311.0/220.0 (16) |
| Epoxiconazole          | 330.1/121.1 (17) | 330.1/100.9 (40) |
| Eprinomectin           | 914.5/186.1 (23) | 914.5/154.1 (23) |
| Esprocarb              | 266.2/196.1 (6)  | 266.2/142.1 (12) |
| Etaconazole            | 330.0/161 (12)   | 330.0/159 (12)   |
| Ethametsulfuron-methyl | 411.0/196.0 (12) | 411.0/168.0 (34) |
| Ethidimuron            | 265.0/208.0 (11) | 265.0/162.0 (15) |
| Ethiofencarb           | 226.1/164.1 (3)  | 226.1/107.1 (9)  |
| Ethiofencarb sulfone   | 258.1/201.1 (10) | 258.1/107.1 (20) |
| Ethiofencarb sulfoxide | 242.1/185.1 (5)  | 242.1/107.1 (15) |
| Ethiolate              | 162.1/134.1 (11) | 162.1/100.1 (14) |
| Ethion                 | 385.0/199.0 (3)  | 385.0/143.0 (21) |
| Ethimirol              | 210.1/140.2 (21) | 210.1/98.0 (27)  |
| Ethofumesate           | 287.1/259.1 (3)  | 287.1/121.1 (11) |
| Ethoprophos            | 243.0/172.9 (10) | 243.0/130.9 (20) |
| Etofenprox             | 394.1/359.1 (2)  | 394.1/177.0 (6)  |
| Etoxazole              | 360.0/141.0 (15) | 360.0/113.0 (23) |
| Famoxadone             | 392.1/331.1 (2)  | 392.1/238.1 (10) |
| Fenamidone             | 312.1/236.1 (9)  | 312.1/92.1 (20)  |
| Fenamiphos             | 304.1/234 (11)   | 304.1/217.0 (19) |
| Fenamiphos sulfone     | 233.1/125.0 (20) | 233.1/161.0 (20) |
| Fenamiphos sulfoxide   | 262.1/220.1 (18) | 262.1/131.1 (31) |
| Fenazaquin             | 307.2/161.1 (11) | 307.2/125.0 (31) |
| Fenbuconazole          | 337.1/125.0 (31) | 337.1/70.1 (17)  |
| Fenhexamid             | 302.0/97.0 (20)  | 302.0/55.0 (35)  |
| Fenobucarb             | 208.1/152.1 (5)  | 208.1/95.1 (10)  |
| Fenathiocarb           | 254.0/72.0 (14)  | 254.0/160.0 (8)  |
| Fenoxanil              | 329.1/302.1 (3)  | 329.1/189.1 (6)  |
| Fenoxaprop-ethyl       | 362.1/288.0 (15) | 362.1/244.1 (12) |
| Fenoxycarb             | 302.1/287.9 (20) | 302.1/88.0 (11)  |
| Fenpropathrin          | 350.1/97.0 (34)  | 350.1/125.0 (14) |
| Fenpropidin            | 274.2/147.1 (30) | 274.2/117.0 (50) |
| Fenpropimorph          | 304.4/147.1 (29) | 304.1/98.2 (29)  |
| Fenpyrazamine          | 332.1/304.1 (13) | 332.1/290.1 (13) |
| Fenpyroximate          | 422.2/138.1 (32) | 422.1/366.1 (15) |
| Fensulfothion          | 309.1/281.0 (9)  | 309.1/253.0 (13) |

|                            |                    |                  |
|----------------------------|--------------------|------------------|
| Fenthion                   | 279.0/247.0 (5)    | 279.0/169.0 (11) |
| Fenthion oxon              | 262.9/231.0 (12)   | 262.9/215.9 (24) |
| Fenthion oxonsulfone       | 295.1/217.1 (14)   | 295.1/104.1 (20) |
| Fenthion oxonsulfoxide     | 279.1/264.1 (14)   | 279.1/104.1 (26) |
| Fenthion sulfone           | 311.0/279.9 (14)   | 311.0/125.0 (28) |
| Fenthion sulfoxide         | 295.0/280.0 /14)   | 295.0/109.0 (32) |
| Fenuron                    | 165.1/120.0 (3)    | 165.1/95.0 (5)   |
| Fipronil                   | 434.7/398.8 (4)    | 434.7/329.8 (10) |
| Flamprop isopropyl         | 364.1/105.0 (29)   | 364.1/77.0 (73)  |
| Flamprop-methyl            | 336.1/105.0 (14)   | 336.1/95.0 (20)  |
| Florasulam                 | 360.4/192.1 (10)   | 360.4/129.2 (24) |
| Fluazifop                  | 456.0/223.0 (15)   | 456.0/344.0 (10) |
| Fluazifop-p-butyl          | 384.2/328.1 (32)   | 384.2/282.1 (20) |
| Fluazinam                  | 462.9/415.9 (13)   | 462.9/397.9 (9)  |
| Flubendiamide              | 681.0/277.9 /24)   | 681.0/253.9 (40) |
| Fludioxonil                | 247.0/180.1 (22)   | 247.0/126.0 (24) |
| Flufenoxuron               | 489.1/141.1 (30)   | 489.1/158.1 (15) |
| Flumetsulam                | 326.0/262.1 (13)   | 326.0/192.0 (23) |
| Fluometuron                | 233.3/160.1 (24)   | 233.3/72.4 (20)  |
| Fluopyram                  | 397.0/207.8 (22)   | 397.0/172.9 (32) |
| Fluoxastrobin              | 459.4/427.4 (14)   | 459.4/188.3 (36) |
| Fluridone                  | 330.1/310.1 (2)    | 330.1/309.1 (2)  |
| Flurochloridone            | 311.9/291.9 (16.0) | 311.9/53.0 (30)  |
| Flutolanil                 | 324.0/262.0 (20)   | 324.0/242.0 (20) |
| Flutriafol                 | 231.2/61.3 (27)    | 231.2/89.2 (10)  |
| Fluxapyroxad               | 382.0/362.0 (10)   | 382.0/342.0 (20) |
| Fomesafen                  | 456.1/344.0 (21)   | 456.1/222.9 (45) |
| Forchlorfenuron            | 248.2/155.1 (10)   | 248.2/129.2 (14) |
| Formothion                 | 250.0/143.0 (6)    | 250.0/258.0 (2)  |
| Furalaxyl                  | 302.0/242.0 (15)   | 302.0/95.0 (25)  |
| Furathiocarb               | 383.2/252.0 (7)    | 383.2/195.0 (13) |
| Haloxypop-etotyl           | 434.0/316.0 (15)   | 434.0/73.1 (13)  |
| Haloxypop-methyl           | 376.0/316.1 (32)   | 376.0/288.0 (25) |
| Heptenophos                | 251.0/125.0 (15)   | 251.0/109.0 (30) |
| Hexaconazole               | 314.1/159.0 (31)   | 314.1/70.1 (17)  |
| Hexaflumuron               | 461.0/158.0 (10)   | 461.0/141.0 (20) |
| Hexazinone                 | 253.2/171.1 (11)   | 253.2/71.2 (31)  |
| Hexythiazox                | 353.1/271.0 (6)    | 353.1/228.0 (8)  |
| Imazalil                   | 297.1/159.0 (19)   | 297.1/41.2 (31)  |
| Imazapyr                   | 262.0/217.0 (18)   | 262.0/148.9 (26) |
| Imazaquin                  | 312.0/199.0 (29)   | 312.0/128.0 (50) |
| Imibenconazole             | 410.9/170.8 (18)   | 410.9/125.0 (34) |
| Imidacloprid               | 256.1/209.0 (10)   | 256.1/175.0 (12) |
| Indanofan                  | 341.1/323.1 (0)    | 341.1/295.1 (3)  |
| Indoxacarb                 | 528.1/203.0 (36)   | 528.1/150.0 (16) |
| Iodosulfuron-methyl sodium | 508.0/167.0 (17)   | 508.0/141.0 (35) |
| Ioxynil                    | 369.8/215.0 (36)   | 369.8/127.0 (30) |
| Ipconazole                 | 334.0/125.0 (48)   | 334.0/70.0 (30)  |
| Iprobenfos                 | 289.0/205.1 (4)    | 289.0/91.0 (20)  |

|                        |                  |                  |
|------------------------|------------------|------------------|
| Isocarbamid            | 186.1/130.1 (7)  | 186.1/87.1 (11)  |
| Isoprocarb             | 211.5/137.1 (13) | 211.5/95.0 (22)  |
| Isopropalin            | 310.2/276.2 (2)  | 310.2/226.1 (4)  |
| Isopyrazam             | 360.2/340.2 (20) | 360.2/320.2 (24) |
| Isoxaben               | 333.0/165.0 (17) | 333.0/107.0 (58) |
| Isoxathion             | 314.1/170.0 (19) | 314.1/105.0 (23) |
| Kresoxim-methyl        | 314.2/267.1 (3)  | 314.2/222.1 (7)  |
| Lactofen               | 479.1/344.0 (0)  | 479.1/223.0 (2)  |
| Lenacil                | 235.2/153.0 (11) | 235.2/136.0 (33) |
| Linuron                | 249.1/182.0 (11) | 249.1/160.0 (13) |
| Lufenuron              | 510.9/158.0 (16) | 510.9/141.0 (44) |
| Malaoxon               | 315.1/127 (10)   | 315.1/99 (20)    |
| Malathion              | 330.9/285.0 (0)  | 330.9/127.0 (4)  |
| MCPA                   | 201.0/142.9 (10) | 201.0/140.9 (10) |
| Mecarbam               | 330.1 /226.9 (5) | 330.1/198.9 (10) |
| Mefenacet              | 299.1/192.0 (3)  | 299.1/148.1 (3)  |
| Mepanipyrin            | 224.0/106.0 (26) | 224.0/77.1 (46)  |
| Mepronil               | 270.0/228.0 (14) | 270.0/119.0 (16) |
| Mesosulfuron-methyl    | 502.1/346.9 (20) | 502.1/266.8 (34) |
| Metaflumizone          | 505.0/302.0 (10) | 505.0/117.0 (48) |
| Metalaxyl-M            | 280.2/220.2 (7)  | 280.2/192.1 (13) |
| Metconazole            | 321.0/125.0 (40) | 321.0/70.0 (22)  |
| Methacrifos            | 241.0/209.0 (5)  | 241.0/124.9 (20) |
| Methamidophos          | 142.0/124.9 (10) | 142.0/93.9 (10)  |
| Methidathion           | 302.9/145.0 (2)  | 302.9/85.0 (10)  |
| Methiocarb             | 226.1/169.1 (5)  | 226.1/121.1 (10) |
| Methiocarb-sulfone     | 258.0/201.0 (14) | 258.0/122.0 (23) |
| Methiocarb-sulfoxide   | 242.0/185.0 (14) | 242.0/122.1 (28) |
| Methomyl               | 163.0/106.0 (5)  | 163.0/88.0 (5)   |
| Methoxyfenozide        | 369.1/149.0 (14) | 369.1/133.1 (28) |
| Metobromuron           | 259.0/169.9 (12) | 259.0/148.0 (8)  |
| Metolachlor            | 284.0/252.1 (8)  | 284.0/176.1 (20) |
| Metosulam              | 418.0/175.0 (25) | 418.0/140.0 (25) |
| Metoxuron              | 229.0/156.0 (17) | 229.0/72.0 (17)  |
| Metribuzin             | 215.2/187.1 (13) | 215.2/84.1 (19)  |
| Metsulfuron-methyl     | 382.1/199.0 (19) | 382.1/167.0 (11) |
| Mevinphos              | 225.1/193.0 (1)  | 225.1/127.0 (11) |
| Molinate               | 188.2/126.1 (9)  | 188.2/55.2 (25)  |
| Monocrotophos          | 224.2/127.0 (8)  | 224.2/58.0 (28)  |
| Monolinuron            | 215.0/148.0 (8)  | 215.0/125.9 (12) |
| Monuron                | 199.1/126.0 (20) | 199.1/72.0 (35)  |
| Myclobutanil           | 289.2/125.1 (27) | 289.2/70.2 (15)  |
| Neburon                | 275.1/88.2 (11)  | 275.1/57.2 (19)  |
| Nicosulfuron           | 411.0/213.0 (10) | 411.0/182.0 (14) |
| Nitenpyram             | 271.1/237.1 (15) | 271.1/224.0 (20) |
| Nuarimol               | 315.0/252.0 (16) | 315.0/81.0 (24)  |
| Omethoate              | 213.9/182.9 (4)  | 213.9/125.0 (16) |
| Orto (2) phenil phenol | 170.1/155.0 (22) | 170.1/141.0 (34) |
| Oxadixyl               | 279.1/219.0 (2)  | 279.1/102.0 (2)  |

|                   |                  |                  |
|-------------------|------------------|------------------|
| Oxamyl            | 237.0/90.0 (0)   | 237.0/72.0 (10)  |
| Penconazole       | 284.1/159.0 (29) | 284.1/70.0 (13)  |
| Pendimethalin     | 282.2/212.0 (3)  | 282.2/194.0 (3)  |
| Phenmedipham      | 301.0/168.0 (4)  | 301.0/136.0 (18) |
| Phenthoate        | 321.0/246.9 (6)  | 321.0/163.0 (8)  |
| Phosalone         | 368.1/322.0 (3)  | 368.1/182.0 (9)  |
| Phosmet           | 317.9/160.0 (5)  | 317.9/133.0 (5)  |
| Phosphamidon      | 300.0/174.0 (8)  | 300.0/127.0 (16) |
| Phoxim            | 299.0/129.0 (2)  | 299.0/97.0 (10)  |
| Phthalide         | 391.3/167.0 (5)  | 391.3/149.0 (5)  |
| Pirimicarb        | 239.2/182.1 (11) | 239.2/72.1 (15)  |
| Pirimiphos-ethyl  | 334.2/198.1 (19) | 334.2/182.1 (19) |
| Pirimiphos-methyl | 306.2/164.1 (19) | 306.2/108.1 (31) |
| Primisulfuron     | 469.0/254.0 (4)  | 469.0/199.0 (6)  |
| Prochloraz        | 376.1/308.0 (5)  | 376.1/265.9 (11) |
| Profenofos        | 372.9/344.9 (10) | 372.9/302.9 (15) |
| Profoxydim        | 466.1/280.1 (12) | 466.1/180.1 (24) |
| Prometryn         | 242.5/200.3 (14) | 242.5/68.1 (44)  |
| Propachlor        | 212.2/170.1 (9)  | 212.2/94.2 (25)  |
| Propanil          | 218.0/162.0 (15) | 218.0/127.0 (20) |
| Propaquizafop     | 444.1/299.1 (20) | 444.1/100.1 (15) |
| Propargite        | 368.1/231.1 (2)  | 368.1/175.0 (8)  |
| Propazine         | 230.2/188.1 (13) | 230.2/146.1 (21) |
| Propham           | 180.1/138.1 (1)  | 180.1/120.1 (13) |
| Propiconazole     | 342.2/159.0 (27) | 342.2/69.2 (17)  |
| Propoxur          | 210.2/111.1 (7)  | 210.2/93.1 (21)  |
| Propyzamide       | 256.1/189.9 (9)  | 256.1/172.9 (17) |
| Pymetrozine       | 218.0/79.0 (16)  | 218.0/79.0 (50)  |
| Pyrazophos        | 374.2/222.0 (17) | 374.2/194.0 (33) |
| Pyridaben         | 365.2/309.1 (7)  | 365.2/147.1 (23) |
| Pyridaphenthion   | 314.2/205.0 (19) | 314.2/189.0 (17) |
| Pyridate          | 379.2/351.1 (3)  | 379.2/207.0 (11) |
| Pyrifenox         | 297.0/93.0 (15)  | 297.0/93.0 (35)  |
| Pyrimethanil      | 200.3/107.0 (11) | 200.3/82.0 (23)  |
| Pyriproxyfen      | 322.2/185.0 (19) | 322.2/96.1 (11)  |
| Quizalofop-p      | 375.1/301.0 (15) | 375.1/299.0 (15) |
| Rimsulfuron       | 432.1/182.0 (19) | 432.1/139.1 (60) |
| Sethoxydim        | 328.2/282.2 (10) | 328.2/178.1 (15) |
| Simetryn          | 214.1/186.1 (0)  | 214.1/144.1 (2)  |
| Spinosad A        | 732.6/98.1 (59)  | 732.6/142.0 (31) |
| Spinosad D        | 746.5/98.1 (53)  | 746.5/142.0 (31) |
| Spirodiclofen     | 411.0/313.0 (11) | 411.0/71.0 (16)  |
| Spiroxamine       | 298.2/144.1 (14) | 298.2/100.0 (28) |
| Sulfluramid       | 526.0/219.0 (7)  | 526.0/169.0 (17) |
| Sulfosulfuron     | 471.0/261.0 (19) | 471.0/211.0 (14) |
| Tebuconazole      | 308.1/124.9 (36) | 308.1/70.0 (18)  |
| Tebufenozide      | 353.1/297.1 (2)  | 353.1/133.0 (14) |
| Tebufenpyrad      | 334.0/145.0 (28) | 334.0/117.0 (40) |
| Teflubenzuron     | 379.0/359.0 (2)  | 379.0/339.0 (2)  |

|                   |                  |                  |
|-------------------|------------------|------------------|
| Terbutryn         | 242.2/186.1 (13) | 242.2/91.1 (25)  |
| Tetrachlorvinphos | 378.9/358.8 (10) | 378.9/96.2 (11)  |
| Tetraconazole     | 372.0/159.0 (35) | 372.0/70.0 (20)  |
| Thiabendazole     | 202.2/175.1 (25) | 202.2/131.1 (35) |
| Thiacloprid       | 253.0/126.0 (16) | 253.0/90.0 (35)  |
| Thiamethoxam      | 292.1/211.1 (5)  | 292.1/181.1 (19) |
| Thiobencarb       | 258.1/125.1 (25) | 258.1/100.1 (5)  |
| Thiodicarb        | 355.1/108.0 (9)  | 355.1/88.0 (9)   |
| Tolylfluanid      | 347.0/238.0 (5)  | 347.0/137.0 (25) |
| Tralkoxydim       | 330.3/284.1 (7)  | 330.3/138.0 (17) |
| Triadimefon       | 294.2/225.1 (7)  | 294.2/197.1 (11) |
| Triadimenol       | 296.1/99.0 (10)  | 296.1/70.0 (5)   |
| Triallate         | 304.0/142.8 (22) | 304.0/86.0 (10)  |
| Triasulfuron      | 402.1/167.1 (25) | 402.1/140.8 (29) |
| Trichlorfon       | 256.8/221.0 (4)  | 256.8/109.0 (12) |
| Trifloxystrobin   | 409.3/206.0 (9)  | 409.3/186.0 (13) |
| Triflumizole      | 346.2/278.0 (3)  | 346.2/43.2 (21)  |
| Triflumuron       | 359.0/156.0 (5)  | 359.0/139.0 (15) |
| Triticonazole     | 318.0/125.0 (30) | 318.0/70.0 (20)  |
| Tritosulfuron     | 445.9/195.0 (18) | 445.9/145.1 (48) |
| Oxamyl            | 237.0/90.0 (0)   | 237.0/72.0 (10)  |
| Vamidothion       | 288.1/146.1 (5)  | 288.1/58.2 (43)  |
| Zoxamide          | 337.9/188.8 (18) | 337.9/186.8 (18) |

**Table S2.** MRM parameters for 52 pesticide residues by GC-MS/MS.

| Pesticide           | MRM transitions                                   |                                                   |
|---------------------|---------------------------------------------------|---------------------------------------------------|
|                     | quantifier ion, <i>m/z</i> (collision energy, eV) | quantifier ion, <i>m/z</i> (collision energy, eV) |
| Acetochlor          | 132.1/117.1 (10)                                  | 132.1/131.1 (10)                                  |
| Alachlor            | 160.1/131.7 (10)                                  | 160.1/188.1 (8)                                   |
| Aldrin              | 91.1 /65.0 (15)                                   | 91.1 /192.9 (30)                                  |
| Atrazine            | 226.3/184.2 (19)                                  | 226.3/99.1 (20)                                   |
| Benfluralin         | 292.1./264.0 (15)                                 | 292.1/160 (10)                                    |
| Bifenazate          | 202/117.1 (23)                                    | 202/127.1 (28)                                    |
| Bifenthrin          | 181.1/160.1 (25)                                  | 181.1/166.1 (10)                                  |
| Bipehynl            | 153.1/152.1 (15)                                  | 154.1/153.1 (15)                                  |
| Butralin            | 266/147.1 (24)                                    | 266/174.1 (21)                                    |
| Captafol            | 79.0/77.0 (14)                                    | 79.0/51.0 (20)                                    |
| Captan              | 151.0/79.0 (20)                                   | 151.0/122 (10)                                    |
| Carbosulfan         | 381.3/160.2 (9)                                   | 381.3/118.2 (15)                                  |
| Chlorothalonil      | 265.9/230.8 (14)                                  | 265.9/168.0 (22)                                  |
| Chlorpropham        | 213.8/171.8 (2)                                   | 213.8/153.8 (12)                                  |
| Chlorpyrifos-methyl | 321.9/289.9 (11)                                  | 321.9/125.0 (17)                                  |
| Cyanophos           | 243.0/109.0 (12)                                  | 243.0/125.0 (14)                                  |
| Cyhalothrin gamma   | 229.1/109.0 (15)                                  | 229.1/120.1 (10)                                  |
| Cyhalothrin lambda  | 197.0/141.0 (12)                                  | 197.0/161.0 (12)                                  |
| Cypermethrin        | 181.1/152.1 (22)                                  | 181.1/127.1 (22)                                  |
| Dazomet             | 162.0/89.0 (5)                                    | 162.0/46.0 (15)                                   |
| Deltamethrin        | 252.9/93.0 (20)                                   | 252.9/171.9 (8)                                   |

|                             |                  |                   |
|-----------------------------|------------------|-------------------|
| Dichlofluanid               | 333.1/224.0 (5)  | 333.1/123.0 (25)  |
| Dicofol                     | 250.0/139.0 (14) | 250.0/215.0 (8)   |
| Dieldrin                    | 276.9/241.0 (8)  | 276.9/170.0 (38)  |
| Dimethipin                  | 118.0/58.0 (6)   | 118.0/76.0 (6)    |
| Dinobuton                   | 211.0/163.0 (8)  | 211/117.0 (18)    |
| Disulfoton                  | 275.0/89.0 (5)   | 275.0/61.0 (20)   |
| Endrin                      | 262.9/193.0 (28) | 262.9/191.0 (30)  |
| Esfenvalerate (Fenvalerate) | 439.0/169.0 (10) | 439.0/167.0 (14)  |
| Fenarimol                   | 330.8/267.9 (20) | 330.8/81.1 (32)   |
| Flumetralin                 | 143.0/107.0 (18) | 143.0/117.0 (20)  |
| Folpet                      | 259.9/130.0 (14) | 259.9/95.0 (20)   |
| Fonofos                     | 247.0/137.0 (5)  | 247.0/109 (15)    |
| Heptachlor                  | 271.8/236.9 (20) | 271.8/117.0 (32)  |
| Iprodione                   | 330.0/287.9 (5)  | 330.0/245.0 (12)  |
| Metamitron                  | 203.2/104.0 (19) | 203.2/42.0 (29)   |
| Nitrapyrin                  | 193.9/133.0 (16) | 193.9/157.9 (20)  |
| Oxyfluorfen                 | 362.0/316.0 (10) | 362.0/237.1 (25)  |
| Parathion-ethyl             | 292.0/264.0 (5)  | 292.0/236.0 (10)  |
| Parathion-metyhl            | 264.0/231.9 (23) | 264.0/124.9 (27)  |
| Permethrin, cis-            | 183.1/168.1 (14) | 183.10/165.1 (10) |
| Permethrin, trans-          | 183.1/168.1 (14) | 183.10/165.1 (10) |
| Phorate                     | 261.0/75.0 (10)  | 261.0/47.0 (28)   |
| Propamocarb                 | 58.0/56.0 (10)   | 59.0/57.0 (10)    |
| Prothiofos                  | 345.0/268.9 (5)  | 345.0/240.9 (13)  |
| Pyrimidifen                 | 384.1/282.0 (18) | 384.1/328.0 (14)  |
| Simazine                    | 202.1/124.2 (13) | 202.1/104.0 (13)  |
| Tau-fluvalinate             | 250.1/55.0 (20)  | 250.1/200.0 (20)  |
| Terbufos                    | 288.9/103 (2)    | 288.9/57.1 (18)   |
| Tetramethrin                | 332.0/286.0 (10) | 332.0/164.0 (29)  |
| Trifluralin                 | 306.1/264.1 (8)  | 306.1/206.1 (14)  |
| Vinclozolin                 | 285.0/212.0 (12) | 285.0/178.0 (14)  |



**Table S3.** The in-house validation data for 311 pesticide residues by LC-MS/MS.

| Pesticide             | Analysed by | LOQ (mg kg <sup>-1</sup> ) | Recovery (%)             |                          | Repeatability (%RSD, <i>n</i> = 5) |                          | Within-laboratory reproducibility (%RSD, <i>n</i> = 10) |                          | <i>U</i> (%) |
|-----------------------|-------------|----------------------------|--------------------------|--------------------------|------------------------------------|--------------------------|---------------------------------------------------------|--------------------------|--------------|
|                       |             |                            | 0.01 mg kg <sup>-1</sup> | 0.05 mg kg <sup>-1</sup> | 0.01 mg kg <sup>-1</sup>           | 0.05 mg kg <sup>-1</sup> | 0.01 mg kg <sup>-1</sup>                                | 0.05 mg kg <sup>-1</sup> |              |
| 2,4-D                 | LC-MS/MS    | 0.008                      | 106                      | 110                      | 6.8                                | 3.6                      | 13.2                                                    | 18.2                     | 44           |
| Acephate              | LC-MS/MS    | 0.008                      | 100                      | 96                       | 19.3                               | 19.1                     | 19.2                                                    | 13.0                     | 50           |
| Acetamiprid           | LC-MS/MS    | 0.005                      | 91                       | 100                      | 8.4                                | 6.5                      | 8.7                                                     | 15.1                     | 35           |
| Acibenzolar-s-methyl  | LC-MS/MS    | 0.007                      | 90                       | 84                       | 16.6                               | 14.0                     | 11.9                                                    | 19.7                     | 49           |
| Aldicarb              | LC-MS/MS    | 0.009                      | 96                       | 106                      | 4.5                                | 4.8                      | 8.8                                                     | 17.4                     | 39           |
| Aldicarb sulfone      | LC-MS/MS    | 0.005                      | 105                      | 99                       | 7.7                                | 9.5                      | 7.8                                                     | 13.3                     | 32           |
| Aldicarb sulfoxide    | LC-MS/MS    | 0.007                      | 106                      | 82                       | 3.4                                | 9.1                      | 6.4                                                     | 19.4                     | 39           |
| Aminocarb             | LC-MS/MS    | 0.006                      | 81                       | 89                       | 9.2                                | 5.6                      | 8.5                                                     | 6.2                      | 37           |
| Amitraz               | LC-MS/MS    | 0.006                      | 84                       | 97                       | 11.6                               | 5.1                      | 10.1                                                    | 14.7                     | 42           |
| Anilofos              | LC-MS/MS    | 0.005                      | 84                       | 114                      | 17.5                               | 5.7                      | 14.1                                                    | 8.5                      | 41           |
| Atrazine-desethyl     | LC-MS/MS    | 0.004                      | 96                       | 99                       | 4.5                                | 7.6                      | 11.4                                                    | 11.7                     | 36           |
| Atrazine-desisopropyl | LC-MS/MS    | 0.009                      | 77                       | 96                       | 11.7                               | 9.8                      | 15.1                                                    | 13.0                     | 43           |
| Azaconazole           | LC-MS/MS    | 0.005                      | 102                      | 102                      | 7.7                                | 3.6                      | 15.1                                                    | 14.2                     | 41           |
| Azamethiphos          | LC-MS/MS    | 0.006                      | 91                       | 79                       | 16.5                               | 7.5                      | 11.6                                                    | 14.9                     | 43           |
| Azinphos ethyl        | LC-MS/MS    | 0.007                      | 86                       | 102                      | 10.0                               | 6.6                      | 13.4                                                    | 10.2                     | 37           |
| Azinphos methyl       | LC-MS/MS    | 0.007                      | 102                      | 101                      | 8.7                                | 6.1                      | 19.2                                                    | 18.1                     | 46           |
| Azoxystrobin          | LC-MS/MS    | 0.003                      | 82                       | 110                      | 12.5                               | 8.9                      | 13.5                                                    | 17.8                     | 45           |
| Benalaxyl             | LC-MS/MS    | 0.003                      | 104                      | 99                       | 15.9                               | 3.0                      | 17.8                                                    | 10.3                     | 40           |
| Benazolin             | LC-MS/MS    | 0.008                      | 97                       | 106                      | 11.8                               | 6.4                      | 16.3                                                    | 17.5                     | 40           |
| Bendiocarb            | LC-MS/MS    | 0.008                      | 100                      | 103                      | 7.8                                | 11.1                     | 11.8                                                    | 11.0                     | 34           |

|                    |          |       |     |     |      |      |      |      |    |
|--------------------|----------|-------|-----|-----|------|------|------|------|----|
| Benodanil          | LC-MS/MS | 0.009 | 97  | 78  | 8.2  | 9.5  | 12.1 | 11.2 | 35 |
| Benoxacor          | LC-MS/MS | 0.006 | 83  | 115 | 19.5 | 2.7  | 18.1 | 16.7 | 48 |
| Bensulfuron-methyl | LC-MS/MS | 0.006 | 87  | 111 | 15.9 | 5.4  | 10.4 | 13.2 | 36 |
| Bentazone          | LC-MS/MS | 0.004 | 77  | 106 | 6.3  | 9.0  | 10.4 | 11.5 | 41 |
| Bitertanol         | LC-MS/MS | 0.008 | 82  | 89  | 16.3 | 4.2  | 17.1 | 11.8 | 41 |
| Bixafen            | LC-MS/MS | 0.010 | 91  | 88  | 7.5  | 6.7  | 11   | 15.4 | 34 |
| Boscalid           | LC-MS/MS | 0.009 | 108 | 110 | 6.7  | 4.2  | 17   | 10.1 | 37 |
| Bromacil           | LC-MS/MS | 0.007 | 102 | 84  | 10,5 | 5.8  | 18.5 | 16.2 | 45 |
| Bromoxynil         | LC-MS/MS | 0.006 | 83  | 112 | 13.5 | 5.1  | 17.5 | 19.2 | 49 |
| Bromuconazole      | LC-MS/MS | 0.007 | 92  | 109 | 8.6  | 7.2  | 16.1 | 15.2 | 39 |
| Bupirimate         | LC-MS/MS | 0.004 | 100 | 110 | 3.0  | 4.9  | 14.3 | 11.3 | 34 |
| Buprofezin         | LC-MS/MS | 0.004 | 96  | 96  | 5.8  | 5.2  | 19.2 | 11.4 | 39 |
| Butachlor          | LC-MS/MS | 0.003 | 101 | 99  | 17.9 | 8.5  | 7.0  | 18.2 | 38 |
| Butafenacil        | LC-MS/MS | 0.008 | 101 | 97  | 5.2  | 5.6  | 13.1 | 15.3 | 39 |
| Butamifos          | LC-MS/MS | 0.005 | 100 | 91  | 7.7  | 5.5  | 13.7 | 18.6 | 43 |
| Buturon            | LC-MS/MS | 0.004 | 89  | 103 | 18.9 | 9.5  | 14.7 | 6.0  | 40 |
| Butylate           | LC-MS/MS | 0.006 | 100 | 99  | 6.8  | 2.8  | 18.3 | 14.1 | 45 |
| Cadusafos          | LC-MS/MS | 0.005 | 87  | 114 | 17.2 | 4.5  | 16.2 | 4.4  | 41 |
| Carbaryl           | LC-MS/MS | 0.004 | 85  | 113 | 15.7 | 3.7  | 9.8  | 15.5 | 41 |
| Carbendazim        | LC-MS/MS | 0.006 | 106 | 89  | 13.5 | 13.3 | 16.7 | 11.0 | 42 |
| Carbofuran         | LC-MS/MS | 0.005 | 80  | 96  | 11.0 | 16.8 | 17.9 | 16.9 | 44 |
| Carboxin           | LC-MS/MS | 0.004 | 78  | 105 | 15.9 | 8.8  | 17.1 | 13.4 | 44 |
| Chlorbromuron      | LC-MS/MS | 0.007 | 84  | 109 | 16.5 | 7.6  | 18.4 | 14.1 | 48 |
| Chlorfluazuron     | LC-MS/MS | 0.006 | 82  | 78  | 14.9 | 3.6  | 14.5 | 16.2 | 43 |
| Chloridazon        | LC-MS/MS | 0.003 | 98  | 106 | 16.1 | 14.4 | 17.8 | 11.5 | 46 |

|                             |          |       |     |     |      |      |      |      |    |
|-----------------------------|----------|-------|-----|-----|------|------|------|------|----|
| Chloroxuron                 | LC-MS/MS | 0.005 | 92  | 114 | 14.1 | 3.8  | 12.9 | 10.6 | 43 |
| Chlorpyrifos                | LC-MS/MS | 0.008 | 85  | 112 | 18.8 | 7.5  | 15.4 | 16.2 | 46 |
| Chlorsulfuron               | LC-MS/MS | 0.004 | 100 | 102 | 11.2 | 18.4 | 19.0 | 13.4 | 49 |
| Cinosulfuron                | LC-MS/MS | 0.005 | 96  | 91  | 10.4 | 9.7  | 10.1 | 16.4 | 37 |
| Clethodim                   | LC-MS/MS | 0.004 | 89  | 91  | 15.7 | 8.3  | 18.1 | 9.2  | 40 |
| Clodinafop propargyl        | LC-MS/MS | 0.005 | 89  | 107 | 8.0  | 4.4  | 12.9 | 16.9 | 39 |
| Clofentezine                | LC-MS/MS | 0.010 | 96  | 81  | 13.8 | 9.6  | 18.8 | 8.3  | 43 |
| Clomazone                   | LC-MS/MS | 0.004 | 81  | 109 | 17.8 | 6.4  | 8.6  | 8.5  | 37 |
| Clopyralid                  | LC-MS/MS | 0.009 | 81  | 108 | 16.4 | 5.3  | 12.8 | 12.5 | 41 |
| Clothianidin                | LC-MS/MS | 0.009 | 85  | 108 | 8.3  | 7.5  | 13.2 | 11.3 | 41 |
| Crimidine                   | LC-MS/MS | 0.005 | 90  | 113 | 16.8 | 6.5  | 18.1 | 10.9 | 43 |
| Crotoxyphos                 | LC-MS/MS | 0.005 | 90  | 103 | 11.5 | 2.3  | 13.4 | 12.1 | 42 |
| Cyanazine                   | LC-MS/MS | 0.005 | 86  | 76  | 13.4 | 5.7  | 11.2 | 8.6  | 32 |
| Cyazofamid                  | LC-MS/MS | 0.008 | 84  | 110 | 11.5 | 5.1  | 11.6 | 12.1 | 41 |
| Cycloate                    | LC-MS/MS | 0.004 | 82  | 94  | 14.9 | 7.1  | 14.7 | 8.4  | 37 |
| Cyclohexamide               | LC-MS/MS | 0.009 | 81  | 90  | 14.1 | 5.7  | 8.6  | 12.5 | 36 |
| Cycloxydim                  | LC-MS/MS | 0.004 | 83  | 80  | 16.9 | 5.2  | 13.9 | 10.6 | 38 |
| Cycluron                    | LC-MS/MS | 0.004 | 93  | 80  | 11.1 | 11.2 | 11.9 | 18.0 | 41 |
| Cyflufenamid                | LC-MS/MS | 0.003 | 90  | 98  | 16.9 | 7.6  | 16.6 | 12.3 | 44 |
| Cyhalofop-butyl             | LC-MS/MS | 0.006 | 83  | 76  | 14.1 | 5.8  | 17.2 | 8.1  | 42 |
| Cymoxanil                   | LC-MS/MS | 0.007 | 91  | 97  | 14.8 | 9.1  | 13.6 | 14.5 | 39 |
| Cyproconazole               | LC-MS/MS | 0.010 | 95  | 103 | 11.6 | 7.2  | 10.7 | 10.6 | 43 |
| Cyprodinil                  | LC-MS/MS | 0.004 | 82  | 109 | 17.8 | 16.5 | 11.2 | 11.1 | 36 |
| Daimuron                    | LC-MS/MS | 0.004 | 90  | 99  | 9.3  | 16.1 | 11.2 | 12.9 | 43 |
| Demeton-s-(disulfoton oxon) | LC-MS/MS | 0.006 | 107 | 92  | 10.6 | 7.3  | 12.2 | 13.4 | 43 |

|                            |          |       |     |     |      |      |      |      |    |
|----------------------------|----------|-------|-----|-----|------|------|------|------|----|
| Demeton-s-methyl sulfone   | LC-MS/MS | 0.009 | 76  | 92  | 17.1 | 14.2 | 10.6 | 19.3 | 50 |
| Demeton-s-methyl sulfoxide | LC-MS/MS | 0.009 | 84  | 107 | 19.7 | 9.7  | 12.4 | 13.6 | 44 |
| Desmedipham                | LC-MS/MS | 0.004 | 77  | 111 | 17.6 | 5.7  | 16.8 | 16.0 | 50 |
| Desmetryn                  | LC-MS/MS | 0.003 | 88  | 79  | 14.3 | 9.1  | 19.4 | 17.3 | 48 |
| Diafenthiuron              | LC-MS/MS | 0.005 | 85  | 77  | 14.0 | 3.5  | 12.9 | 11.1 | 36 |
| Diazinon                   | LC-MS/MS | 0.003 | 82  | 108 | 11.1 | 5.9  | 9.9  | 14.1 | 39 |
| Diazinon-oxon              | LC-MS/MS | 0.004 | 92  | 91  | 18.2 | 16.3 | 9.1  | 13.2 | 38 |
| Dichlormid                 | LC-MS/MS | 0.004 | 97  | 77  | 8.2  | 8.9  | 14.6 | 19.0 | 36 |
| Dichlorprop                | LC-MS/MS | 0.005 | 78  | 108 | 8.2  | 5.8  | 18.8 | 15.8 | 45 |
| Dichlorvos                 | LC-MS/MS | 0.008 | 82  | 94  | 12.1 | 8.2  | 18.9 | 9.1  | 41 |
| Diclobutrazol              | LC-MS/MS | 0.007 | 90  | 102 | 13.9 | 8.5  | 13.8 | 15.9 | 40 |
| Dicrotophos                | LC-MS/MS | 0.006 | 92  | 92  | 7.8  | 7.7  | 5.5  | 6.2  | 19 |
| Diethofencarb              | LC-MS/MS | 0.005 | 88  | 111 | 17.8 | 5.4  | 14.8 | 11.1 | 44 |
| Difenoconazole             | LC-MS/MS | 0.005 | 89  | 75  | 17.5 | 4.9  | 17   | 17.4 | 44 |
| Difenoxuron                | LC-MS/MS | 0.003 | 85  | 75  | 15.3 | 8.2  | 15.2 | 17.1 | 47 |
| Diffubenzuron              | LC-MS/MS | 0.007 | 112 | 93  | 5.5  | 9.3  | 13.5 | 12.0 | 33 |
| Dimefuron                  | LC-MS/MS | 0.004 | 77  | 113 | 15.6 | 6.8  | 13.3 | 9.2  | 35 |
| Dimethachlor               | LC-MS/MS | 0.003 | 83  | 103 | 17.7 | 12.9 | 13.3 | 9.7  | 44 |
| Dimethenamid               | LC-MS/MS | 0.004 | 78  | 105 | 19.4 | 7.8  | 10.4 | 9.7  | 38 |
| Dimethoate                 | LC-MS/MS | 0.004 | 92  | 111 | 9.8  | 5.7  | 15.8 | 11.3 | 32 |
| Dimethomorph               | LC-MS/MS | 0.003 | 78  | 96  | 19.4 | 3.9  | 17.5 | 6.9  | 46 |
| Dimetilan                  | LC-MS/MS | 0.004 | 89  | 101 | 4.2  | 13.1 | 7.5  | 13.2 | 32 |
| Dimoxystrobin              | LC-MS/MS | 0.006 | 85  | 113 | 19   | 4.1  | 15.8 | 12.1 | 46 |
| Diniconazole               | LC-MS/MS | 0.007 | 78  | 77  | 12.9 | 4.9  | 11.6 | 16.0 | 37 |
| Dinitramine                | LC-MS/MS | 0.009 | 82  | 107 | 6.4  | 8.7  | 6.9  | 15.3 | 39 |

|                        |          |       |     |     |      |      |      |      |    |
|------------------------|----------|-------|-----|-----|------|------|------|------|----|
| Dinocap                | LC-MS/MS | 0.004 | 99  | 93  | 14.3 | 5.9  | 12.0 | 12.2 | 37 |
| Dinotefuran            | LC-MS/MS | 0.011 | 85  | 92  | 12.1 | 8.3  | 11.8 | 9.9  | 36 |
| Dioxacarb              | LC-MS/MS | 0.005 | 80  | 94  | 6.0  | 12.9 | 18.7 | 9.7  | 40 |
| Diphenamid             | LC-MS/MS | 0.003 | 78  | 105 | 19.4 | 7.8  | 10.4 | 9.7  | 38 |
| Disulfoton sulfone     | LC-MS/MS | 0.009 | 80  | 116 | 17.2 | 4.8  | 16.8 | 11.1 | 41 |
| Disulfoton sulfoxide   | LC-MS/MS | 0.009 | 81  | 109 | 19.5 | 7.5  | 8.9  | 15.4 | 45 |
| Dithianon              | LC-MS/MS | 0.007 | 82  | 92  | 9.4  | 7.9  | 18.3 | 16.7 | 49 |
| Dithiopyr              | LC-MS/MS | 0.006 | 90  | 102 | 13.9 | 8.5  | 13.8 | 15.9 | 40 |
| Diuron                 | LC-MS/MS | 0.004 | 90  | 100 | 19.6 | 7.9  | 17.3 | 12.8 | 49 |
| Dodine                 | LC-MS/MS | 0.004 | 87  | 97  | 18.4 | 3.4  | 14.2 | 11.2 | 39 |
| Edifenphos             | LC-MS/MS | 0.004 | 83  | 107 | 6.4  | 5.7  | 10.9 | 16.1 | 36 |
| Epoxiconazole          | LC-MS/MS | 0.004 | 101 | 86  | 11.7 | 4.4  | 17.3 | 13.2 | 39 |
| Eprinomectin           | LC-MS/MS | 0.010 | 85  | 112 | 18.6 | 5.0  | 19.1 | 12.8 | 45 |
| Esprocarb              | LC-MS/MS | 0.003 | 86  | 98  | 5.3  | 13.6 | 14.7 | 15.8 | 46 |
| Etaconazole            | LC-MS/MS | 0.005 | 85  | 108 | 19.6 | 5.9  | 15.1 | 13.9 | 45 |
| Ethametsulfuron-methyl | LC-MS/MS | 0.003 | 101 | 101 | 12.8 | 9.4  | 5.4  | 14.7 | 44 |
| Ethidimuron            | LC-MS/MS | 0.004 | 79  | 94  | 14.7 | 4.8  | 19.0 | 10.6 | 38 |
| Ethiofencarb           | LC-MS/MS | 0.004 | 83  | 104 | 16.1 | 6.0  | 12.3 | 16.6 | 45 |
| Ethiofencarb sulfone   | LC-MS/MS | 0.003 | 88  | 83  | 19.8 | 9.4  | 8.7  | 16.6 | 42 |
| Ethiofencarb sulfoxide | LC-MS/MS | 0.007 | 99  | 97  | 5.8  | 9.8  | 10.2 | 9.2  | 39 |
| Ethiolate              | LC-MS/MS | 0.005 | 85  | 112 | 18.6 | 5.1  | 19.1 | 12.8 | 45 |
| Ethion                 | LC-MS/MS | 0.004 | 88  | 88  | 16.8 | 4.8  | 11.8 | 10.6 | 35 |
| Ethimirol              | LC-MS/MS | 0.003 | 89  | 112 | 14.0 | 8.9  | 14.2 | 9.2  | 45 |
| Ethofumesate           | LC-MS/MS | 0.007 | 79  | 110 | 13.9 | 5.5  | 17.1 | 17.2 | 42 |
| Ethoprophos            | LC-MS/MS | 0.003 | 80  | 113 | 17.3 | 5.2  | 13.6 | 17.2 | 45 |

|                        |          |       |     |     |      |      |      |      |    |
|------------------------|----------|-------|-----|-----|------|------|------|------|----|
| Etofenprox             | LC-MS/MS | 0.005 | 84  | 88  | 3.3  | 14.3 | 15.2 | 17.0 | 46 |
| Etoxazole              | LC-MS/MS | 0.003 | 84  | 97  | 17.9 | 4.7  | 18.7 | 10.2 | 41 |
| Famoxadone             | LC-MS/MS | 0.010 | 97  | 83  | 15.5 | 10.3 | 16.2 | 9.8  | 40 |
| Fenamidone             | LC-MS/MS | 0.005 | 88  | 100 | 18.3 | 8.6  | 16.2 | 10.8 | 39 |
| Fenamiphos             | LC-MS/MS | 0.004 | 83  | 108 | 9.9  | 8    | 6.3  | 18.2 | 39 |
| Fenamiphos sulfone     | LC-MS/MS | 0.005 | 84  | 99  | 5.9  | 9.5  | 11.9 | 15.7 | 42 |
| Fenamiphos sulfoxide   | LC-MS/MS | 0.005 | 90  | 103 | 14.4 | 6.2  | 16.1 | 11.3 | 43 |
| Fenazaquin             | LC-MS/MS | 0.005 | 80  | 87  | 4.6  | 2.8  | 19.8 | 15.5 | 43 |
| Fenbuconazole          | LC-MS/MS | 0.008 | 84  | 87  | 14.7 | 5.2  | 12.8 | 19.0 | 43 |
| Fenhexamid             | LC-MS/MS | 0.010 | 85  | 87  | 18.1 | 9.0  | 13.7 | 13.2 | 41 |
| Fenobucarb             | LC-MS/MS | 0.003 | 82  | 109 | 16.8 | 13.6 | 19.1 | 16.9 | 49 |
| Fenathiocarb           | LC-MS/MS | 0.004 | 98  | 98  | 7.1  | 10.5 | 12   | 20.0 | 43 |
| Fenoxanil              | LC-MS/MS | 0.007 | 84  | 112 | 12.7 | 7.2  | 12.8 | 19.5 | 38 |
| Fenoxaprop-ethyl       | LC-MS/MS | 0.005 | 83  | 90  | 19.4 | 3.9  | 19.7 | 5.2  | 44 |
| Fenoxycarb             | LC-MS/MS | 0.004 | 87  | 88  | 15.2 | 6.5  | 15.8 | 11.6 | 43 |
| Fenpropathrin          | LC-MS/MS | 0.010 | 84  | 102 | 15.9 | 7.1  | 17.9 | 16.9 | 45 |
| Fenpropidin            | LC-MS/MS | 0.004 | 99  | 100 | 10.2 | 9.6  | 19.6 | 16.5 | 49 |
| Fenpropimorph          | LC-MS/MS | 0.004 | 83  | 92  | 18.0 | 5.7  | 11.2 | 14.3 | 38 |
| Fenpyrazamine          | LC-MS/MS | 0.005 | 104 | 77  | 6.3  | 4.3  | 12.3 | 11.3 | 34 |
| Fenpyroximate          | LC-MS/MS | 0.007 | 92  | 73  | 3.9  | 2.2  | 16.8 | 11.9 | 37 |
| Fensulfothion          | LC-MS/MS | 0.003 | 80  | 105 | 1.7  | 16.8 | 17.2 | 18.4 | 48 |
| Fenthion               | LC-MS/MS | 0.007 | 86  | 86  | 13.7 | 7.7  | 19.1 | 14.3 | 47 |
| Fenthion oxon          | LC-MS/MS | 0.003 | 81  | 95  | 6.1  | 13.4 | 16.8 | 17.4 | 47 |
| Fenthion oxonsulfone   | LC-MS/MS | 0.004 | 108 | 100 | 6.4  | 5.1  | 12.3 | 13.6 | 50 |
| Fenthion oxonsulfoxide | LC-MS/MS | 0.003 | 93  | 97  | 13.7 | 12.8 | 7.7  | 7.2  | 36 |

|                    |          |       |     |     |      |      |      |      |    |
|--------------------|----------|-------|-----|-----|------|------|------|------|----|
| Fenthion sulfone   | LC-MS/MS | 0.005 | 81  | 115 | 10.8 | 6.2  | 13.9 | 18.4 | 44 |
| Fenthion sulfoxide | LC-MS/MS | 0.005 | 88  | 112 | 19.3 | 3.9  | 13.9 | 15.4 | 43 |
| Fenuron            | LC-MS/MS | 0.003 | 77  | 110 | 18.7 | 6.9  | 12.9 | 13.1 | 43 |
| Fipronil           | LC-MS/MS | 0.006 | 86  | 82  | 16.7 | 9.7  | 17.4 | 18.4 | 50 |
| Flamprop isopropyl | LC-MS/MS | 0.003 | 90  | 107 | 16.1 | 11.5 | 12.6 | 14.5 | 46 |
| Flamprop-methyl    | LC-MS/MS | 0.004 | 84  | 95  | 16.8 | 8.8  | 14.7 | 13.9 | 42 |
| Florasulam         | LC-MS/MS | 0.009 | 88  | 93  | 16.0 | 4.5  | 7.8  | 8.2  | 35 |
| Fluazifop          | LC-MS/MS | 0.007 | 84  | 89  | 16.6 | 14.8 | 14.8 | 15.3 | 42 |
| Fluazifop-p-butyl  | LC-MS/MS | 0.004 | 86  | 91  | 17.2 | 4.5  | 17.6 | 4.6  | 49 |
| Fluazinam          | LC-MS/MS | 0.004 | 109 | 113 | 7.1  | 4.6  | 19.3 | 11.3 | 38 |
| Flubendiamide      | LC-MS/MS | 0.006 | 96  | 97  | 13.9 | 4.7  | 17.3 | 14.3 | 42 |
| Fludioxonil        | LC-MS/MS | 0.004 | 87  | 98  | 9.0  | 6.4  | 11.3 | 8.4  | 27 |
| Flufenoxuron       | LC-MS/MS | 0.008 | 83  | 73  | 15.4 | 2.1  | 12.9 | 8.7  | 32 |
| Flumetsulam        | LC-MS/MS | 0.003 | 96  | 76  | 13.9 | 5.4  | 7.0  | 15.9 | 40 |
| Fluometuron        | LC-MS/MS | 0.004 | 88  | 105 | 19.7 | 7.5  | 13.1 | 13.1 | 43 |
| Fluopyram          | LC-MS/MS | 0.009 | 90  | 113 | 17.4 | 4.4  | 11.8 | 11.9 | 38 |
| Fluoxastrobin      | LC-MS/MS | 0.005 | 83  | 105 | 13.0 | 4.8  | 10.1 | 14.6 | 36 |
| Fluridone          | LC-MS/MS | 0.004 | 85  | 111 | 16.9 | 7.7  | 16.2 | 14.1 | 47 |
| Flurochloridone    | LC-MS/MS | 0.009 | 96  | 103 | 13.8 | 6.9  | 13.3 | 10.1 | 38 |
| Flutolanil         | LC-MS/MS | 0.004 | 81  | 114 | 19.2 | 4.7  | 15.3 | 15.4 | 42 |
| Flutriafol         | LC-MS/MS | 0.006 | 93  | 83  | 16.9 | 7.7  | 13.6 | 17.1 | 46 |
| Fluxapyroxad       | LC-MS/MS | 0.004 | 87  | 114 | 18.2 | 4.9  | 12.3 | 14.7 | 44 |
| Fomesafen          | LC-MS/MS | 0.008 | 79  | 95  | 13.7 | 7.4  | 14.9 | 13.0 | 39 |
| Forchlorfenuron    | LC-MS/MS | 0.007 | 98  | 85  | 13.9 | 7.1  | 8.9  | 7.8  | 39 |
| Formothion         | LC-MS/MS | 0.006 | 97  | 108 | 18.8 | 13.8 | 18.1 | 11.9 | 44 |

|                            |          |       |     |     |      |      |      |      |    |
|----------------------------|----------|-------|-----|-----|------|------|------|------|----|
| Furalaxyl                  | LC-MS/MS | 0.004 | 104 | 100 | 12.7 | 5.4  | 10.4 | 8.6  | 34 |
| Furathiocarb               | LC-MS/MS | 0.004 | 104 | 99  | 15.9 | 4.7  | 14.3 | 17.8 | 43 |
| Haloxypop-etotyl           | LC-MS/MS | 0.004 | 100 | 96  | 16.3 | 13.5 | 12.1 | 11.3 | 40 |
| Haloxypop-methyl           | LC-MS/MS | 0.004 | 108 | 84  | 6.2  | 7.3  | 13.1 | 10.9 | 32 |
| Heptenophos                | LC-MS/MS | 0.005 | 98  | 101 | 6.6  | 15.6 | 9.6  | 9.4  | 35 |
| Hexaconazole               | LC-MS/MS | 0.009 | 101 | 96  | 7.1  | 11.4 | 13.7 | 7.9  | 37 |
| Hexaflumuron               | LC-MS/MS | 0.006 | 102 | 90  | 9.2  | 10.4 | 13.0 | 7.9  | 35 |
| Hexazinone                 | LC-MS/MS | 0.004 | 108 | 107 | 14.0 | 5.8  | 17.3 | 13.4 | 46 |
| Hexythiazox                | LC-MS/MS | 0.006 | 87  | 80  | 17.0 | 8.4  | 14.5 | 8.5  | 39 |
| Imazalil                   | LC-MS/MS | 0.006 | 95  | 99  | 4.6  | 6.5  | 12.3 | 14.9 | 37 |
| Imazapyr                   | LC-MS/MS | 0.010 | 83  | 99  | 11.5 | 9.0  | 15.2 | 12.0 | 37 |
| Imazaquin                  | LC-MS/MS | 0.004 | 102 | 107 | 13.7 | 8.5  | 19.4 | 14.5 | 47 |
| Imibenconazole             | LC-MS/MS | 0.008 | 102 | 107 | 8.8  | 4.6  | 9.3  | 17.8 | 31 |
| Imidacloprid               | LC-MS/MS | 0.007 | 102 | 106 | 11.0 | 2.6  | 15.6 | 17.8 | 45 |
| Indanofan                  | LC-MS/MS | 0.009 | 113 | 108 | 2.8  | 5.9  | 16.1 | 14.5 | 38 |
| Indoxacarb                 | LC-MS/MS | 0.007 | 104 | 93  | 15.4 | 13.6 | 17.5 | 19.9 | 49 |
| Iodosulfuron-methyl sodium | LC-MS/MS | 0.007 | 93  | 93  | 13.0 | 13.5 | 12.0 | 13.1 | 34 |
| Ioxynil                    | LC-MS/MS | 0.008 | 80  | 106 | 8.2  | 3.8  | 15.8 | 16.5 | 41 |
| Ipconazole                 | LC-MS/MS | 0.005 | 102 | 84  | 9.2  | 4.8  | 15.8 | 16.6 | 45 |
| Iprobenfos                 | LC-MS/MS | 0.007 | 98  | 97  | 15.4 | 19.6 | 11.3 | 15.5 | 45 |
| Isocarbamid                | LC-MS/MS | 0.004 | 107 | 97  | 6.9  | 4.3  | 15.8 | 19.3 | 44 |
| Isoprocarb                 | LC-MS/MS | 0.005 | 99  | 104 | 14.2 | 14.1 | 11.9 | 18.2 | 45 |
| Isopropalin                | LC-MS/MS | 0.006 | 100 | 101 | 6.0  | 6.9  | 13.9 | 12.8 | 39 |
| Isopyrazam                 | LC-MS/MS | 0.004 | 98  | 103 | 14.3 | 2.6  | 13.1 | 12.7 | 33 |
| Isoxaben                   | LC-MS/MS | 0.003 | 108 | 97  | 4.9  | 4.7  | 16.3 | 5.0  | 37 |



|                      |          |       |     |     |      |      |      |      |    |
|----------------------|----------|-------|-----|-----|------|------|------|------|----|
| Isoxathion           | LC-MS/MS | 0.004 | 106 | 100 | 8.0  | 6.5  | 10.8 | 15.6 | 36 |
| Kresoxim-methyl      | LC-MS/MS | 0.005 | 106 | 92  | 15.7 | 14.9 | 10.6 | 17.0 | 46 |
| Lactofen             | LC-MS/MS | 0.007 | 100 | 111 | 10.0 | 9.7  | 15.1 | 12.8 | 41 |
| Lenacil              | LC-MS/MS | 0.004 | 104 | 108 | 5.2  | 3.6  | 8.5  | 16.7 | 35 |
| Linuron              | LC-MS/MS | 0.005 | 97  | 92  | 11.8 | 8.8  | 16.1 | 17.1 | 47 |
| Lufenuron            | LC-MS/MS | 0.007 | 91  | 102 | 7.0  | 9.3  | 7.5  | 16.7 | 45 |
| Malaoxon             | LC-MS/MS | 0.004 | 106 | 107 | 3.1  | 3.2  | 6.4  | 18.3 | 39 |
| Malathion            | LC-MS/MS | 0.005 | 89  | 100 | 19.1 | 15.2 | 12.0 | 19.9 | 48 |
| MCPA                 | LC-MS/MS | 0.008 | 95  | 103 | 8.3  | 16.6 | 12.2 | 17.4 | 45 |
| Mecarbam             | LC-MS/MS | 0.003 | 98  | 105 | 18.7 | 8.3  | 17.6 | 8.1  | 45 |
| Mefenacet            | LC-MS/MS | 0.007 | 99  | 104 | 5.2  | 3.0  | 19.9 | 16.1 | 47 |
| Mepanipyrim          | LC-MS/MS | 0.004 | 106 | 105 | 9.0  | 7.5  | 16.8 | 19.1 | 50 |
| Mepronil             | LC-MS/MS | 0.004 | 105 | 94  | 8.4  | 4.8  | 6.2  | 15.0 | 36 |
| Mesosulfuron-methyl  | LC-MS/MS | 0.008 | 98  | 95  | 13.7 | 6.4  | 14.9 | 14.8 | 39 |
| Metaflumizone        | LC-MS/MS | 0.009 | 101 | 105 | 6.6  | 10.3 | 14.0 | 13.7 | 44 |
| Metalaxyl-M          | LC-MS/MS | 0.004 | 114 | 112 | 14.1 | 11.7 | 17.7 | 10.5 | 44 |
| Metconazole          | LC-MS/MS | 0.004 | 108 | 106 | 4.4  | 6.0  | 11.6 | 4.7  | 34 |
| Methacrifos          | LC-MS/MS | 0.006 | 104 | 110 | 10.8 | 11.0 | 14.3 | 17.8 | 46 |
| Methamidophos        | LC-MS/MS | 0.007 | 97  | 103 | 17.5 | 13.1 | 10.3 | 15.6 | 42 |
| Methidathion         | LC-MS/MS | 0.005 | 94  | 95  | 8.9  | 12.3 | 17.5 | 14.3 | 40 |
| Methiocarb           | LC-MS/MS | 0.005 | 112 | 118 | 4.5  | 6.1  | 13.6 | 18.5 | 37 |
| Methiocarb-sulfone   | LC-MS/MS | 0.004 | 115 | 109 | 14.9 | 9.3  | 13.6 | 13.9 | 39 |
| Methiocarb-sulfoxide | LC-MS/MS | 0.005 | 105 | 97  | 13.6 | 7.6  | 17.8 | 13.9 | 41 |
| Methomyl             | LC-MS/MS | 0.007 | 98  | 94  | 4.7  | 19.5 | 7.4  | 17.9 | 42 |
| Methoxyfenozide      | LC-MS/MS | 0.005 | 90  | 100 | 17.7 | 15.4 | 17.0 | 7.7  | 46 |

|                        |          |       |     |     |      |      |      |      |    |
|------------------------|----------|-------|-----|-----|------|------|------|------|----|
| Metobromuron           | LC-MS/MS | 0.005 | 106 | 111 | 15.0 | 5.0  | 17.7 | 17.6 | 48 |
| Metolachlor            | LC-MS/MS | 0.007 | 101 | 93  | 6.3  | 10.0 | 17.7 | 11.6 | 37 |
| Metosulam              | LC-MS/MS | 0.005 | 109 | 108 | 3.8  | 13.9 | 18.4 | 11.1 | 41 |
| Metoxuron              | LC-MS/MS | 0.004 | 100 | 103 | 5.3  | 5.1  | 18.7 | 16.1 | 46 |
| Metribuzin             | LC-MS/MS | 0.009 | 107 | 107 | 9.2  | 8.7  | 12.0 | 14.6 | 39 |
| Metsulfuron-methyl     | LC-MS/MS | 0.005 | 109 | 98  | 6.0  | 5.9  | 11.2 | 6.1  | 36 |
| Mevinphos              | LC-MS/MS | 0.005 | 113 | 109 | 7.8  | 7.8  | 10.0 | 12.0 | 33 |
| Molinate               | LC-MS/MS | 0.006 | 113 | 93  | 4.2  | 4.5  | 11.4 | 6.1  | 32 |
| Monocrotophos          | LC-MS/MS | 0.009 | 101 | 93  | 6.6  | 10.7 | 7.6  | 16.4 | 46 |
| Monolinuron            | LC-MS/MS | 0.005 | 106 | 110 | 8.1  | 3.0  | 7.6  | 19.1 | 42 |
| Monuron                | LC-MS/MS | 0.004 | 114 | 102 | 4.8  | 7.0  | 13.1 | 11.6 | 41 |
| Myclobutanil           | LC-MS/MS | 0.005 | 105 | 113 | 8.2  | 2.8  | 18.8 | 11.6 | 40 |
| Neburon                | LC-MS/MS | 0.008 | 101 | 94  | 12.4 | 4.4  | 14.7 | 18.1 | 44 |
| Nicosulfuron           | LC-MS/MS | 0.004 | 109 | 110 | 5.2  | 4.7  | 10.2 | 5.6  | 33 |
| Nitenpyram             | LC-MS/MS | 0.009 | 92  | 94  | 17.8 | 10.1 | 3.9  | 17.3 | 40 |
| Nuarimol               | LC-MS/MS | 0.004 | 93  | 91  | 16.0 | 7.4  | 15.2 | 8.9  | 41 |
| Omethoate              | LC-MS/MS | 0.010 | 76  | 94  | 8.8  | 9.4  | 13.9 | 7.9  | 45 |
| Orto (2) phenil phenol | LC-MS/MS | 0.009 | 110 | 110 | 8.4  | 6.2  | 8.6  | 7.9  | 37 |
| Oxadixyl               | LC-MS/MS | 0.010 | 110 | 109 | 4.4  | 7.3  | 17.0 | 17.3 | 40 |
| Oxamyl                 | LC-MS/MS | 0.008 | 110 | 110 | 12.7 | 17.5 | 12.0 | 17.8 | 46 |
| Penconazole            | LC-MS/MS | 0.004 | 109 | 95  | 10.6 | 3.4  | 8.9  | 12.8 | 40 |
| Pendimethalin          | LC-MS/MS | 0.007 | 106 | 104 | 8.7  | 12.0 | 10.1 | 12.1 | 34 |
| Phenmedipham           | LC-MS/MS | 0.005 | 116 | 100 | 1.4  | 6.1  | 11.2 | 19.2 | 40 |
| Phenthoate             | LC-MS/MS | 0.005 | 110 | 103 | 3.8  | 5.0  | 14.2 | 10.0 | 34 |
| Phosalone              | LC-MS/MS | 0.008 | 113 | 112 | 2.6  | 5.4  | 9.9  | 18.0 | 37 |

|                   |          |       |     |     |      |      |      |      |    |
|-------------------|----------|-------|-----|-----|------|------|------|------|----|
| Phosmet           | LC-MS/MS | 0.005 | 95  | 112 | 3.7  | 3.7  | 12.6 | 15.8 | 36 |
| Phosphamidon      | LC-MS/MS | 0.004 | 109 | 112 | 5.9  | 4.8  | 6.2  | 15.8 | 34 |
| Phoxim            | LC-MS/MS | 0.004 | 104 | 94  | 9.4  | 13.7 | 17.7 | 14.3 | 45 |
| Phthalide         | LC-MS/MS | 0.009 | 116 | 106 | 3.2  | 7.3  | 12.4 | 7.7  | 36 |
| Pirimicarb        | LC-MS/MS | 0.005 | 113 | 109 | 5.7  | 8.3  | 14.3 | 11.7 | 40 |
| Pirimiphos-ethyl  | LC-MS/MS | 0.005 | 106 | 99  | 5.8  | 5.4  | 17.5 | 18.4 | 42 |
| Pirimiphos-methyl | LC-MS/MS | 0.005 | 105 | 102 | 8.3  | 8.7  | 11.8 | 19.3 | 44 |
| Primisulfuron     | LC-MS/MS | 0.008 | 103 | 109 | 2.5  | 3.6  | 18.0 | 18.9 | 48 |
| Prochloraz        | LC-MS/MS | 0.006 | 116 | 112 | 3.7  | 4.9  | 15.7 | 9.8  | 40 |
| Profenofos        | LC-MS/MS | 0.004 | 112 | 113 | 11.8 | 3.8  | 18.0 | 12.2 | 39 |
| Profoxydim        | LC-MS/MS | 0.004 | 95  | 98  | 13.8 | 17.9 | 12.4 | 7.7  | 36 |
| Prometryn         | LC-MS/MS | 0.005 | 110 | 89  | 7.3  | 4.3  | 10.1 | 11.3 | 39 |
| Propachlor        | LC-MS/MS | 0.003 | 110 | 100 | 6.6  | 2.9  | 4.5  | 17.2 | 32 |
| Propanil          | LC-MS/MS | 0.009 | 84  | 108 | 9.6  | 6.3  | 16.2 | 10.4 | 37 |
| Propaquizafop     | LC-MS/MS | 0.007 | 103 | 111 | 12.1 | 7.8  | 17.7 | 13.3 | 40 |
| Propargite        | LC-MS/MS | 0.004 | 92  | 96  | 16.8 | 12.7 | 9.2  | 10.0 | 36 |
| Propazine         | LC-MS/MS | 0.006 | 104 | 94  | 6.6  | 3.7  | 19.8 | 19.4 | 47 |
| Propham           | LC-MS/MS | 0.010 | 107 | 101 | 10.4 | 13.2 | 8.3  | 9.9  | 34 |
| Propiconazole     | LC-MS/MS | 0.005 | 101 | 111 | 6.7  | 5.7  | 14.0 | 12.2 | 35 |
| Propoxur          | LC-MS/MS | 0.009 | 108 | 106 | 9.4  | 4.6  | 16.4 | 16.1 | 42 |
| Propyzamide       | LC-MS/MS | 0.007 | 113 | 101 | 4.2  | 14.0 | 16.7 | 11.2 | 45 |
| Pymetrozine       | LC-MS/MS | 0.008 | 99  | 95  | 7.4  | 9.8  | 8.5  | 18.7 | 41 |
| Pyrazophos        | LC-MS/MS | 0.006 | 100 | 109 | 14.7 | 9.6  | 13.6 | 12.7 | 41 |
| Pyridaben         | LC-MS/MS | 0.005 | 104 | 107 | 8.4  | 5.9  | 10.3 | 14.7 | 35 |
| Pyridaphenthion   | LC-MS/MS | 0.006 | 106 | 96  | 3.5  | 10.6 | 9.1  | 14.1 | 38 |

|                   |          |       |     |     |      |      |      |      |    |
|-------------------|----------|-------|-----|-----|------|------|------|------|----|
| Pyridate          | LC-MS/MS | 0.006 | 86  | 87  | 4.4  | 5.4  | 13.6 | 14.2 | 38 |
| PyrifenoX         | LC-MS/MS | 0.004 | 105 | 85  | 11.7 | 9.8  | 5.1  | 15.1 | 35 |
| Pyrimethanil      | LC-MS/MS | 0.004 | 113 | 103 | 4.5  | 3.0  | 17.4 | 19.6 | 43 |
| Pyriproxyfen      | LC-MS/MS | 0.004 | 107 | 99  | 6.6  | 6.7  | 18.7 | 9.1  | 39 |
| Quizalofop-p      | LC-MS/MS | 0.010 | 103 | 111 | 12.1 | 7.8  | 17.7 | 13.3 | 40 |
| Rimsulfuron       | LC-MS/MS | 0.004 | 106 | 101 | 7.6  | 8.9  | 9.7  | 10.9 | 36 |
| Sethoxydim        | LC-MS/MS | 0.005 | 111 | 103 | 4.7  | 6.1  | 18.2 | 13.2 | 41 |
| Simetryn          | LC-MS/MS | 0.004 | 107 | 104 | 3.0  | 5.0  | 16.5 | 14.2 | 39 |
| Spinosad A        | LC-MS/MS | 0.009 | 77  | 99  | 10.8 | 6.8  | 13.4 | 12.9 | 40 |
| Spinosad D        | LC-MS/MS | 0.004 | 93  | 90  | 10.3 | 5.1  | 13.0 | 19.1 | 42 |
| Spirodiclofen     | LC-MS/MS | 0.009 | 113 | 98  | 5.1  | 14.9 | 6.3  | 19.7 | 40 |
| Spiroxamine       | LC-MS/MS | 0.003 | 109 | 102 | 6.1  | 10.6 | 9.8  | 10.6 | 35 |
| Sulfluramid       | LC-MS/MS | 0.005 | 105 | 96  | 5.5  | 4.3  | 7.8  | 13.7 | 34 |
| Sulfosulfuron     | LC-MS/MS | 0.006 | 99  | 100 | 8.8  | 5.9  | 7.9  | 15.6 | 38 |
| Tebuconazole      | LC-MS/MS | 0.006 | 94  | 95  | 12.9 | 9.2  | 17.0 | 11.5 | 43 |
| Tebufenozide      | LC-MS/MS | 0.004 | 99  | 103 | 19.1 | 15.6 | 18.8 | 10.0 | 46 |
| Tebufenpyrad      | LC-MS/MS | 0.005 | 107 | 107 | 5.7  | 8.4  | 15.1 | 8.1  | 31 |
| Teflubenzuron     | LC-MS/MS | 0.006 | 105 | 102 | 8.5  | 10.6 | 13.7 | 11.2 | 38 |
| Terbutryn         | LC-MS/MS | 0.004 | 100 | 93  | 5.5  | 4.6  | 10.7 | 19.1 | 43 |
| Tetrachlorvinphos | LC-MS/MS | 0.010 | 105 | 99  | 10.9 | 6.1  | 8.1  | 13.9 | 37 |
| Tetraconazole     | LC-MS/MS | 0.006 | 106 | 102 | 8.1  | 9.3  | 6.6  | 9.2  | 33 |
| Thiabendazole     | LC-MS/MS | 0.005 | 83  | 101 | 10.7 | 5.2  | 15.0 | 9.2  | 38 |
| Thiacloprid       | LC-MS/MS | 0.004 | 106 | 103 | 7.8  | 6.1  | 12.7 | 16.5 | 39 |
| Thiamethoxam      | LC-MS/MS | 0.009 | 94  | 93  | 12.8 | 8.6  | 14.5 | 16.8 | 44 |
| Thiobencarb       | LC-MS/MS | 0.005 | 96  | 94  | 11.8 | 10.1 | 11.5 | 15.9 | 44 |

|                 |          |       |     |     |      |      |      |      |    |
|-----------------|----------|-------|-----|-----|------|------|------|------|----|
| Thiodicarb      | LC-MS/MS | 0.008 | 108 | 106 | 9.4  | 10.5 | 14.7 | 14.1 | 38 |
| Tolyfluanid     | LC-MS/MS | 0.006 | 106 | 105 | 5.9  | 14.0 | 12.5 | 12.0 | 45 |
| Tralkoxydim     | LC-MS/MS | 0.006 | 105 | 102 | 6.1  | 5.9  | 17.4 | 13.4 | 38 |
| Triadimefon     | LC-MS/MS | 0.005 | 104 | 101 | 10.1 | 6.6  | 8.2  | 11.9 | 34 |
| Triadimenol     | LC-MS/MS | 0.008 | 103 | 97  | 9.2  | 9.4  | 4.4  | 9.6  | 27 |
| Triallate       | LC-MS/MS | 0.009 | 106 | 103 | 9.4  | 9.7  | 15.4 | 18.1 | 46 |
| Triasulfuron    | LC-MS/MS | 0.008 | 109 | 104 | 6.2  | 7.7  | 7.8  | 9.1  | 34 |
| Trichlorfon     | LC-MS/MS | 0.008 | 103 | 86  | 11.9 | 7.6  | 13.7 | 16.3 | 45 |
| Trifloxystrobin | LC-MS/MS | 0.005 | 106 | 99  | 6.0  | 10.7 | 10.5 | 11.7 | 37 |
| Triflumizole    | LC-MS/MS | 0.006 | 99  | 101 | 14.3 | 10.2 | 15.1 | 12.7 | 44 |
| Triflumuron     | LC-MS/MS | 0.008 | 108 | 109 | 7.3  | 3.1  | 7.8  | 5.8  | 22 |
| Triticonazole   | LC-MS/MS | 0.005 | 104 | 109 | 7.4  | 4.3  | 13.6 | 6.1  | 37 |
| Tritosulfuron   | LC-MS/MS | 0.009 | 100 | 95  | 11.4 | 15.2 | 17.1 | 16.1 | 50 |
| Oxamyl          | LC-MS/MS | 0.009 | 83  | 111 | 12.8 | 2.1  | 13.7 | 9.4  | 37 |
| Vamidothion     | LC-MS/MS | 0.007 | 106 | 108 | 7.4  | 5.2  | 6.3  | 7.4  | 32 |
| Zoxamide        | LC-MS/MS | 0.005 | 112 | 104 | 1.5  | 3.2  | 14.3 | 15.9 | 39 |

**Table S4.** The in-house validation data for 52 pesticide residues by GC-MS/MS.

| Pesticide   | Analysed by | LOQ (mg kg <sup>-1</sup> ) | Recovery (%)             |                          | Repeatability (%RSD, <i>n</i> = 5) |                          | Within-laboratory reproducibility (%RSD, <i>n</i> = 10) |                          | <i>U</i> (%) |
|-------------|-------------|----------------------------|--------------------------|--------------------------|------------------------------------|--------------------------|---------------------------------------------------------|--------------------------|--------------|
|             |             |                            | 0.01 mg kg <sup>-1</sup> | 0.05 mg kg <sup>-1</sup> | 0.01 mg kg <sup>-1</sup>           | 0.05 mg kg <sup>-1</sup> | 0.01 mg kg <sup>-1</sup>                                | 0.05 mg kg <sup>-1</sup> |              |
| Acetochlor  | GC-MS/MS    | 0.011                      | 80                       | 105                      | 7.8                                | 6.7                      | 10.5                                                    | 18.6                     | 42           |
| Alachlor    | GC-MS/MS    | 0.011                      | 92                       | 100                      | 8.5                                | 10.1                     | 12.8                                                    | 16.2                     | 38           |
| Aldrin      | GC-MS/MS    | 0.011                      | 85                       | 81                       | 7.5                                | 6.4                      | 6.0                                                     | 10.8                     | 25           |
| Atrazine    | GC-MS/MS    | 0.012                      | 81                       | 112                      | 9.8                                | 19.0                     | 13.1                                                    | 13.7                     | 43           |
| Benfluralin | GC-MS/MS    | 0.009                      | 109                      | 85                       | 7.3                                | 5.5                      | 12.7                                                    | 12.3                     | 29           |

|                                |          |       |     |     |      |      |      |      |    |
|--------------------------------|----------|-------|-----|-----|------|------|------|------|----|
| Bifenazate                     | GC-MS/MS | 0.009 | 82  | 108 | 19.8 | 5.4  | 11.5 | 15.4 | 45 |
| Bifenthrin                     | GC-MS/MS | 0.011 | 105 | 82  | 14.5 | 6.0  | 17.6 | 19.6 | 49 |
| Bipehynl                       | GC-MS/MS | 0.010 | 97  | 78  | 3.6  | 6.9  | 6.3  | 10.2 | 20 |
| Butralin                       | GC-MS/MS | 0.009 | 95  | 87  | 11.3 | 18.7 | 14.6 | 15.7 | 42 |
| Captafol                       | GC-MS/MS | 0.010 | 106 | 89  | 13.5 | 13.3 | 16.7 | 11.2 | 42 |
| Captan                         | GC-MS/MS | 0.010 | 105 | 98  | 6.1  | 11.8 | 5.3  | 14.6 | 30 |
| Carbosulfan                    | GC-MS/MS | 0.009 | 98  | 86  | 19.6 | 15.5 | 18.6 | 15.4 | 49 |
| Chlorothalonil                 | GC-MS/MS | 0.010 | 105 | 93  | 6.3  | 15.2 | 6.5  | 8.8  | 26 |
| Chlorpropham                   | GC-MS/MS | 0.010 | 96  | 98  | 13.4 | 7.3  | 15.1 | 6.3  | 37 |
| Chlorpyrifos-methyl            | GC-MS/MS | 0.010 | 79  | 95  | 10.1 | 8.0  | 19.2 | 5.2  | 36 |
| Cyanophos                      | GC-MS/MS | 0.009 | 86  | 85  | 15.9 | 11.2 | 13.8 | 14.9 | 39 |
| Cyhalothrin gamma              | GC-MS/MS | 0.008 | 93  | 78  | 15.5 | 8.4  | 18.1 | 3.8  | 43 |
| Cyhalothrin lambda             | GC-MS/MS | 0.009 | 109 | 113 | 8.3  | 3.8  | 19.7 | 4.7  | 45 |
| Cypermethrin                   | GC-MS/MS | 0.009 | 96  | 75  | 13.1 | 4.1  | 18.3 | 14.3 | 48 |
| Dazomet                        | GC-MS/MS | 0.012 | 91  | 81  | 10.4 | 12.3 | 14.1 | 11.0 | 36 |
| Deltamethrin                   | GC-MS/MS | 0.012 | 85  | 75  | 18.3 | 3.1  | 12.4 | 14.5 | 44 |
| Dichlofluanid                  | GC-MS/MS | 0.009 | 78  | 107 | 6.1  | 6.2  | 15.4 | 19.6 | 41 |
| Dicofol                        | GC-MS/MS | 0.009 | 80  | 83  | 5.9  | 5.2  | 8.1  | 6.7  | 22 |
| Dieldrin                       | GC-MS/MS | 0.009 | 91  | 87  | 5.4  | 8.5  | 3.4  | 10.8 | 27 |
| Dimethipin                     | GC-MS/MS | 0.009 | 87  | 111 | 15.7 | 5.1  | 9.9  | 13.9 | 35 |
| Dinobuton                      | GC-MS/MS | 0.011 | 99  | 77  | 15.4 | 7.7  | 16.1 | 11.2 | 32 |
| Disulfoton                     | GC-MS/MS | 0.010 | 80  | 82  | 17.9 | 7.9  | 9.0  | 13.2 | 40 |
| Endrin                         | GC-MS/MS | 0.013 | 106 | 100 | 6.2  | 9.2  | 16.7 | 3.5  | 34 |
| Esfenvalerate<br>(Fenvalerate) | GC-MS/MS | 0.011 | 105 | 79  | 11.8 | 5.4  | 12.8 | 14.2 | 36 |
| Fenarimol                      | GC-MS/MS | 0.011 | 86  | 88  | 13   | 5.7  | 18.9 | 16.5 | 48 |

|                    |          |       |     |     |      |      |      |      |    |
|--------------------|----------|-------|-----|-----|------|------|------|------|----|
| Flumetralin        | GC-MS/MS | 0.011 | 104 | 90  | 18.3 | 6.7  | 17.6 | 17.3 | 41 |
| Folpet             | GC-MS/MS | 0.009 | 93  | 90  | 12.1 | 15.1 | 8.8  | 10.7 | 34 |
| Fonofos            | GC-MS/MS | 0.010 | 83  | 78  | 8.6  | 5.7  | 15.9 | 15.5 | 40 |
| Heptachlor         | GC-MS/MS | 0.009 | 91  | 87  | 12.8 | 12.6 | 14.9 | 12.3 | 37 |
| Iprodione          | GC-MS/MS | 0.011 | 103 | 111 | 15.7 | 5.4  | 18.4 | 17.2 | 48 |
| Metamitron         | GC-MS/MS | 0.012 | 101 | 94  | 7.2  | 18.8 | 18.2 | 12.3 | 45 |
| Nitrapyrin         | GC-MS/MS | 0.010 | 105 | 105 | 8.5  | 3.2  | 16.3 | 17.3 | 44 |
| Oxyfluorfen        | GC-MS/MS | 0.008 | 95  | 86  | 13.3 | 19.3 | 12.4 | 5.1  | 36 |
| Parathion-ethyl    | GC-MS/MS | 0.010 | 104 | 97  | 14.6 | 10.4 | 11.7 | 6.7  | 38 |
| Parathion-metylhl  | GC-MS/MS | 0.011 | 96  | 91  | 12.9 | 12.4 | 5.1  | 12.4 | 33 |
| Permethrin, cis-   | GC-MS/MS | 0.010 | 100 | 103 | 13.3 | 9.0  | 18.1 | 11.0 | 45 |
| Permethrin, trans- | GC-MS/MS | 0.010 | 106 | 92  | 9.6  | 6.3  | 18.0 | 14.1 | 46 |
| Phorate            | GC-MS/MS | 0.009 | 107 | 96  | 7.7  | 10.8 | 5.6  | 12.3 | 32 |
| Propamocarb        | GC-MS/MS | 0.011 | 86  | 80  | 10.2 | 4.8  | 5.7  | 12.6 | 32 |
| Prothiofos         | GC-MS/MS | 0.010 | 94  | 93  | 19.2 | 9.4  | 19.7 | 11.9 | 49 |
| Pyrimidifen        | GC-MS/MS | 0.011 | 117 | 87  | 3.2  | 16.7 | 13.2 | 13.5 | 37 |
| Simazine           | GC-MS/MS | 0.011 | 105 | 114 | 14.1 | 3.6  | 6.4  | 19.5 | 40 |
| Tau-fluvalinate    | GC-MS/MS | 0.010 | 93  | 107 | 13.7 | 12.0 | 6.8  | 15.1 | 46 |
| Terbufos           | GC-MS/MS | 0.008 | 86  | 91  | 16.7 | 17.8 | 17.3 | 8.3  | 44 |
| Tetramethrin       | GC-MS/MS | 0.010 | 116 | 109 | 4.1  | 5.4  | 18.3 | 12.0 | 41 |
| Trifluralin        | GC-MS/MS | 0.010 | 108 | 102 | 4.8  | 9.0  | 8.2  | 16.1 | 34 |
| Vinclozolin        | GC-MS/MS | 0.010 | 101 | 107 | 17.5 | 7.0  | 12.6 | 9.5  | 35 |
